# Supplementary material
Source: PubMed Central journal article supplement (PMC2826838)
Supplement: NIHMS168071-supplement-1_si_002.pdf [file NIHMS168071-supplement-1_si_002.pdf]

# Supplemental Information

**Identification of Furan Metabolites Derived from Cysteine-*cis*-2-Butene-1,4-Dial-**

**Lysine Crosslinks**

Ding Lu and Lisa A. Peterson

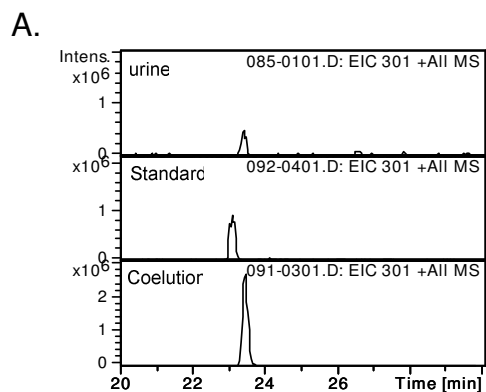

**B.**

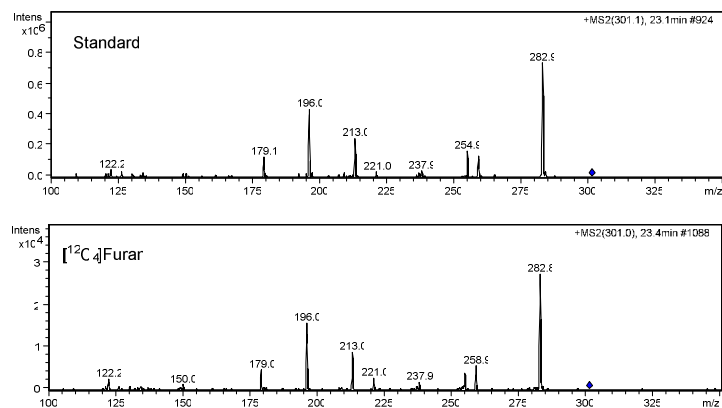

### Supplemental Figure 1.

**A.** Extracted ion current at 301 Da demonstrating co-elution of the urinary metabolite with *S*-[1-(5-acetylamino-5-carboxypentyl)-1*H*-pyrrol-3-yl]methanethiol sulfoxide (**8**). LC-MS/MS analysis was performed on a Synergi column according to HPLC Method 5.

**B.** The mass spectra for synthetic **8** and furan metabolite **8**.

A.

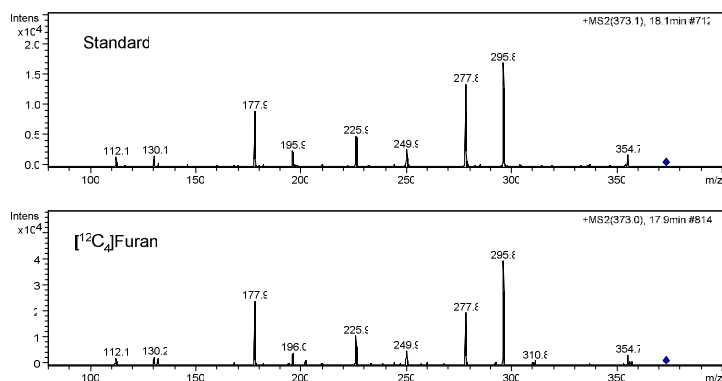

B.

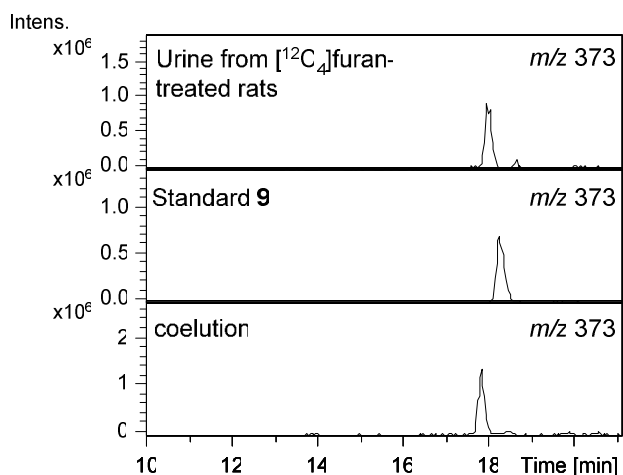

### Supplemental Figure 2.

A. The mass spectra corresponding to synthetic **9** and furan metabolite **9**.

B. Extracted ion current at 373 Da demonstrating co-elution of the urinary metabolite with *N*-acetyl-*S*-[1-(5-oxo-5-carboxypentyl)-1*H*-pyrrol-3-yl]-*L*-cysteine sulfoxide (**9**). LC-MS/MS analysis was performed on a Synergi column according to HPLC Method 5.

A.

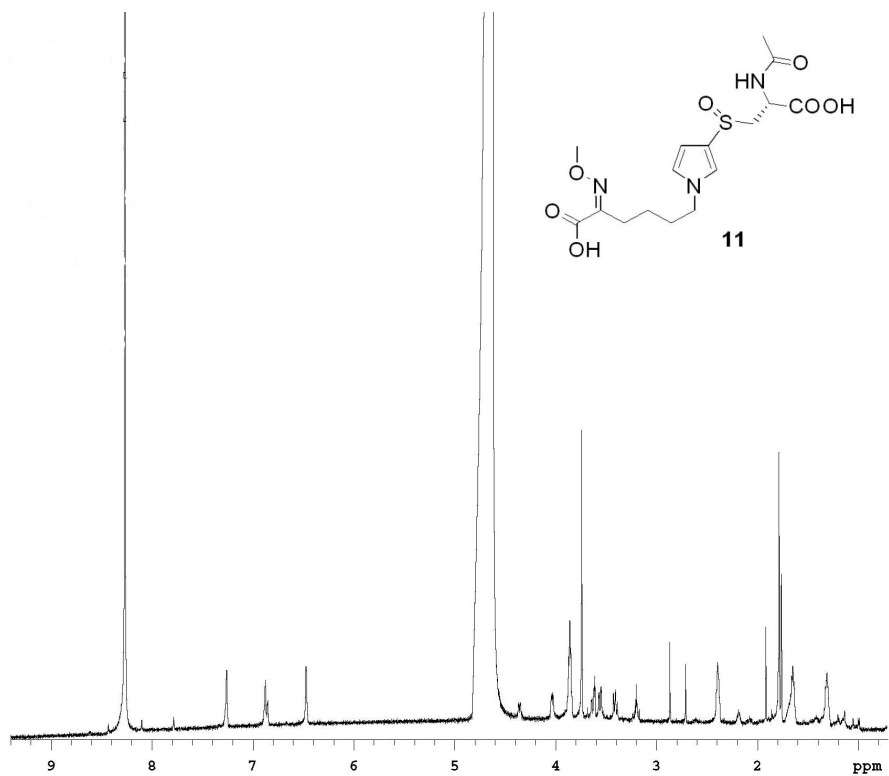

B.

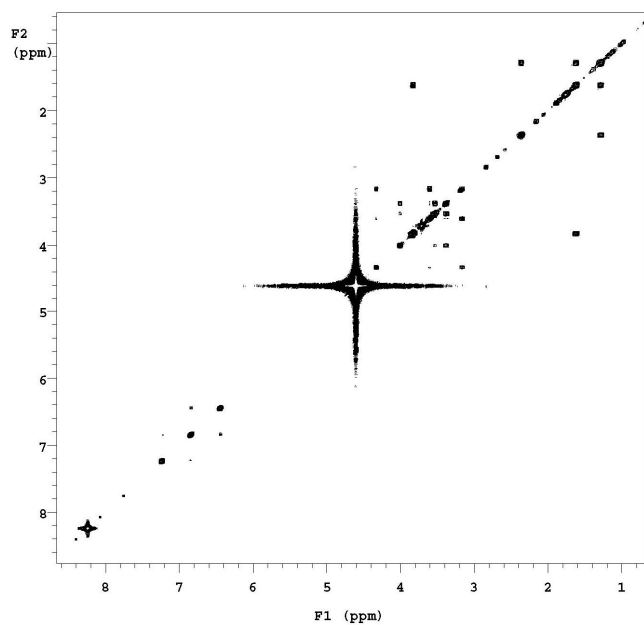

**Supplemental Figure 3.**

**A.** <sup>1</sup>H NMR spectrum of synthetic *N*-acetyl-*S*-[1-(5-methoxyimino-5-carboxypentyl)-1*H*-pyrrol-3-yl]-L-cysteine sulfoxide (**11**)

**B.** COSY NMR of **11**

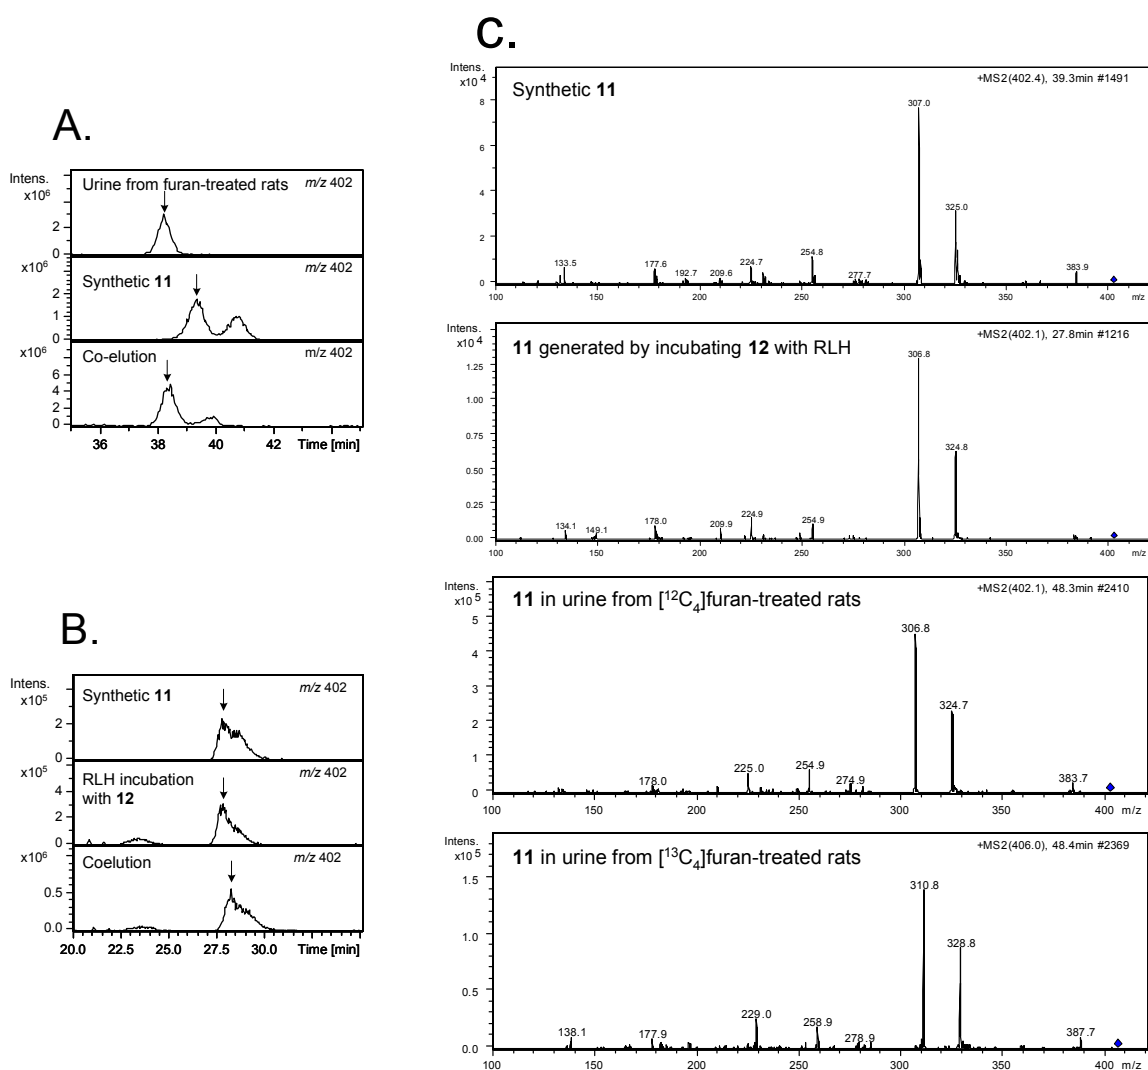

#### Supplemental Figure 4.

**A.** Extracted ion current at 402 Da showing co-elution of *N*-acetyl-*S*-[1-(5-methoxyimino-5-carboxypentyl)-1*H*-pyrrol-3-yl]-*L*-cysteine sulfoxide (**11**) with urinary metabolite **9** following reaction with methoxyamine. LC-MS/MS analysis was performed on a Zorbax column eluted according to HPLC Method 3.

**B.** Extracted ion current at 402 Da showing co-elution of synthetic **11** with the RLH generated metabolite of *N*-acetyl-*S*-[1-(5-amino-5-carboxypentyl)-1*H*-pyrrol-3-yl]-*L*-cysteine sulfoxide (**12**) following reaction with methoxyamine. LC-MS/MS analysis was performed on a Luna column eluted according to HPLC Method 6.

**C.** The mass spectra of synthetic **11** and **11** formed when supernatant from RLH incubations of **12** or urine from furan-treated rats are reacted with methoxyamine. RLH = rat liver homogenate.

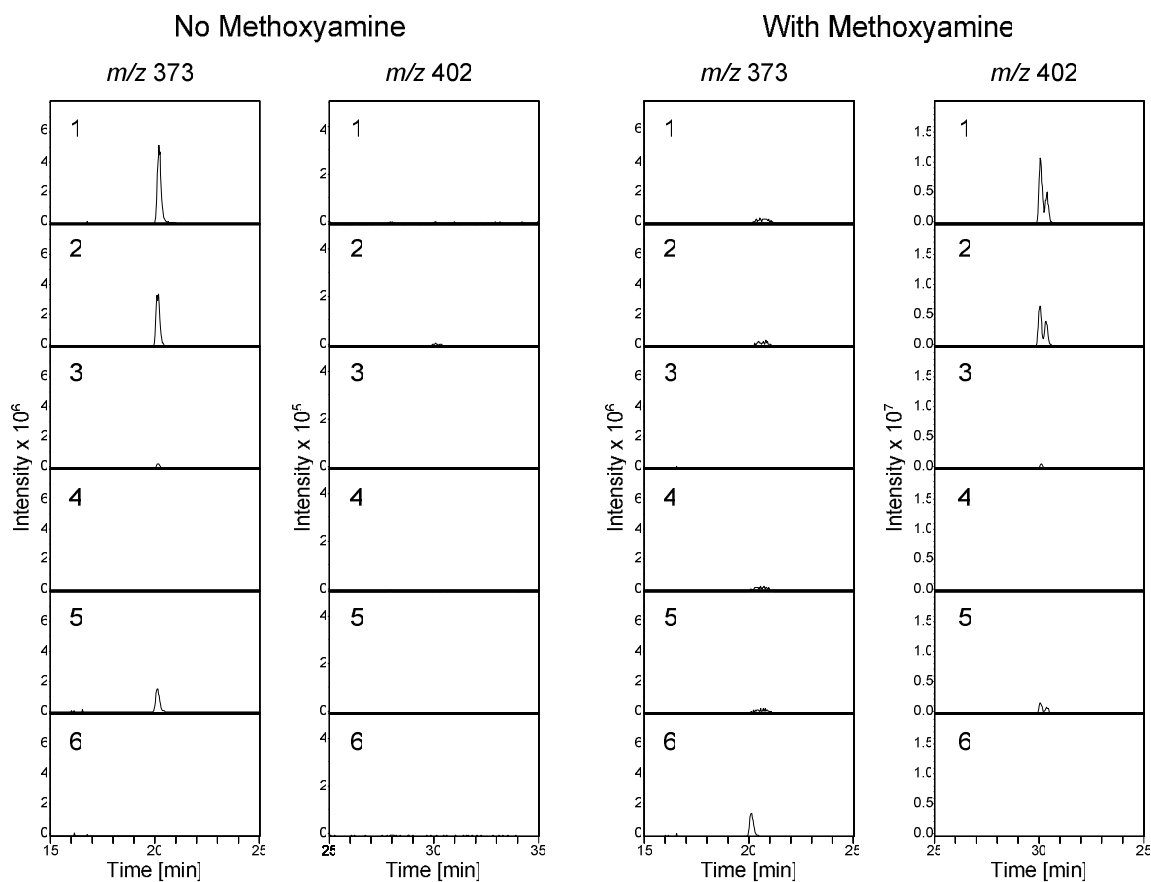

| Condition | substrate | RLH    | PLP+AKGA |
|-----------|-----------|--------|----------|
| 1         | +         | +      | +        |
| 2         | +         | -      | +        |
| 3         | +         | +      | -        |
| 4         | -         | +      | +        |
| 5         | +         | Boiled | +        |
| 6         | +         | Boiled | -        |

**Supplemental Figure 5.**

Extracted mass chromatograms obtained at  $m/z$  373 and 402 for the incubation of **12** with rat liver homogenate employing HPLC method 5. RLH = rat liver homogenate; PLP = pyridoxal 5'-phosphate; and AKGA =  $\alpha$ -ketoglutaric acid.

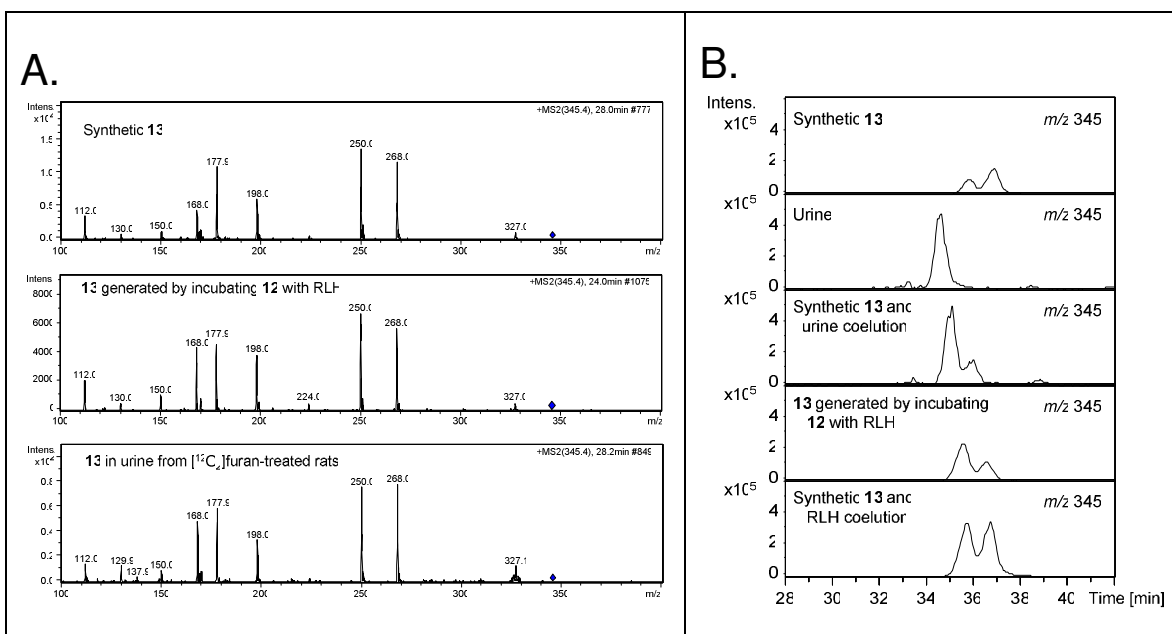

### Supplemental Figure 6.

**A.** The mass spectra of *N*-acetyl-*S*-[1-(4-carboxybutyl)-1*H*-pyrrol-3-yl]-*L*-cysteine sulfoxide (**13**), the metabolite formed in RLH incubations of **12** and the urinary metabolite.

**B.** Extracted ion current at 345 Da demonstrating co-elution of the urinary metabolite and RLH metabolite of **12** with synthetic **13**. LC-MS/MS analysis was performed on a Zorbax column according to HPLC Method 3. The synthesis of **13** generated two diastereomers. Only one of these diastereomers is observed in urine of furan-treated rats. The diastereomeric distribution of **13** in the RLH incubations reflects the diastereomeric distribution of the starting compound **12** which is different from that of synthetic **13**.

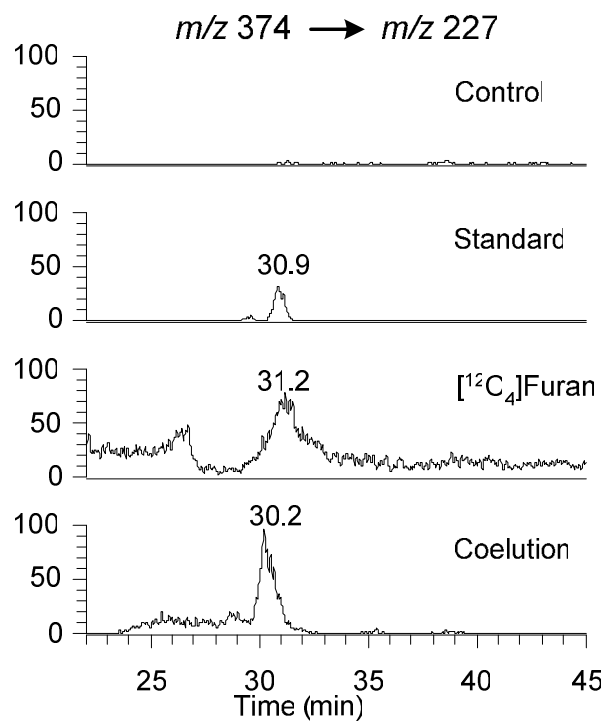

### Supplemental Figure 7

LC-ESI-MS/MS analysis demonstrating coelution of the synthetic standard *N*-acetyl-*S*-[1-(5-amino-5-carboxypentyl)-1*H*-pyrrol-3-yl]-L-cysteine sulfoxide (**12**) with urinary metabolite **12** by selected reaction monitoring of  $m/z$  374  $\rightarrow$   $m/z$  277 by LC-ESI-MS/MS analysis on a Synergi column according to HPLC Method 3.



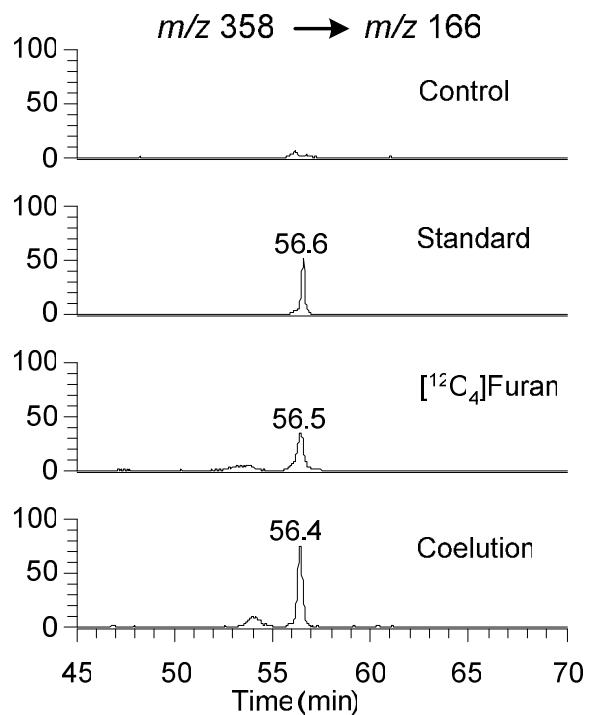

### Supplemental Figure 8

LC/ESI-MS/MS analysis demonstrating coelution of the synthetic standard *N*-acetyl-*S*-[1-(5-amino-5-carboxypentyl)-1*H*-pyrrol-3-yl]-*L*-cysteine (**14**) with urinary metabolite **14** by selected reaction monitoring of  $m/z$  358  $\rightarrow$   $m/z$  166 by LC-ESI-MS/MS analysis on a Synergi column according to HPLC Method 3. This transition was chosen for the coelution experiment since it provided more intense signals than  $m/z$  358  $\rightarrow$   $m/z$  229.

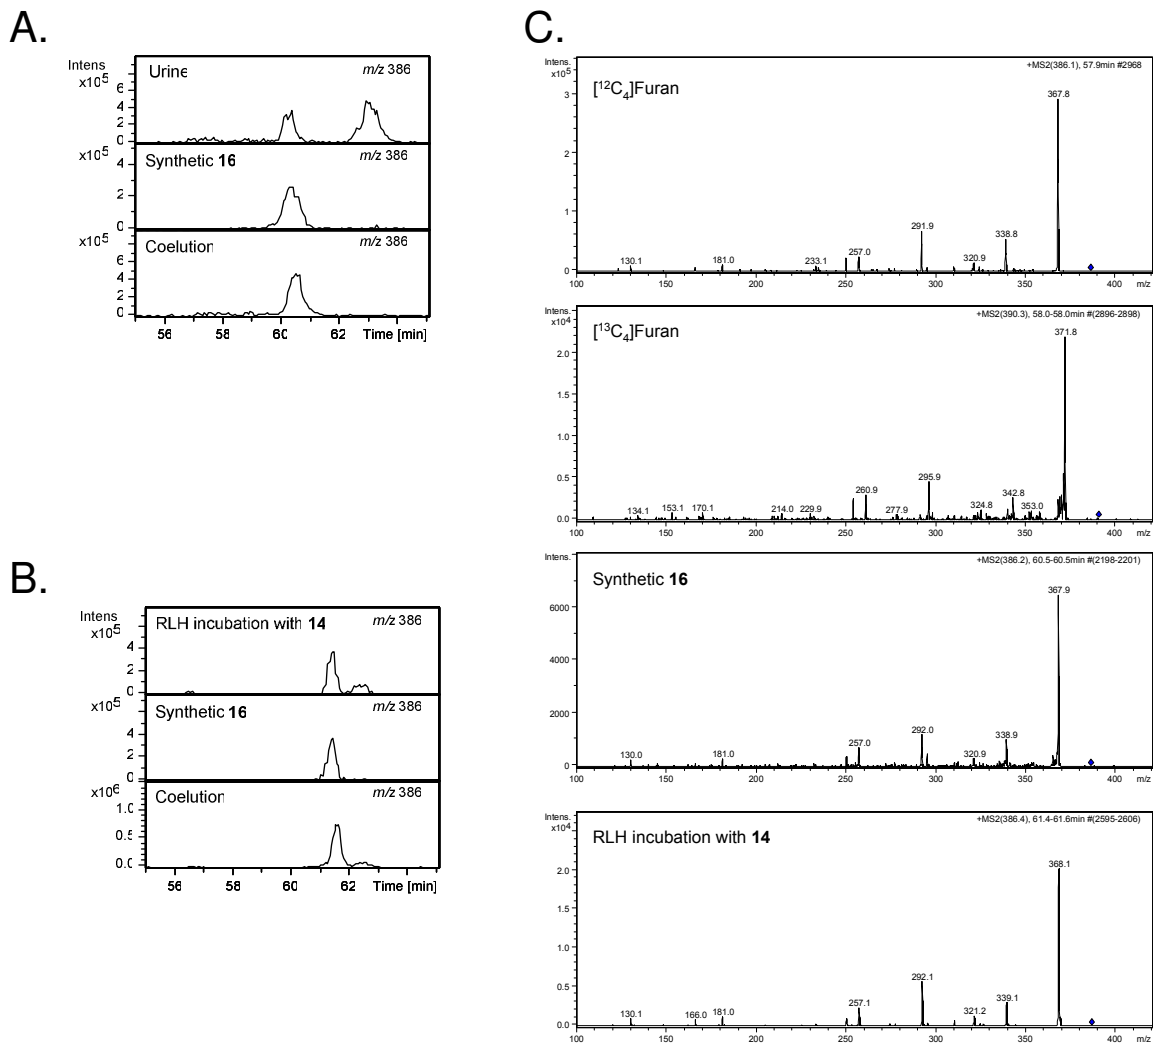

### Supplemental Figure 9.

**A.** Extracted ion current at 386 Da showing co-elution of *N*-acetyl-*S*-[1-(5-methoxyimino-5-carboxypentyl)-1*H*-pyrrol-3-yl]-L-cysteine (**16**) with urinary metabolite *N*-acetyl-*S*-[1-(5-oxo-5-carboxypentyl)-1*H*-pyrrol-3-yl]-L-cysteine (**15**) following reaction with methoxyamine. LC-MS/MS analysis was performed on a Synergi column eluted according to HPLC Method 3.

**B.** Extracted ion current at 386 Da showing co-elution of synthetic **16** with the RLH generated metabolite of **14** following reaction with methoxyamine. LC-MS/MS analysis was performed on a Synergi column eluted according to HPLC Method 3.

**C.** The mass spectra of synthetic **16** and **16** formed when urine from furan-treated rats or supernatant from RLH incubations of **14** are reacted with methoxyamine.

RLH = rat liver homogenate.

A.

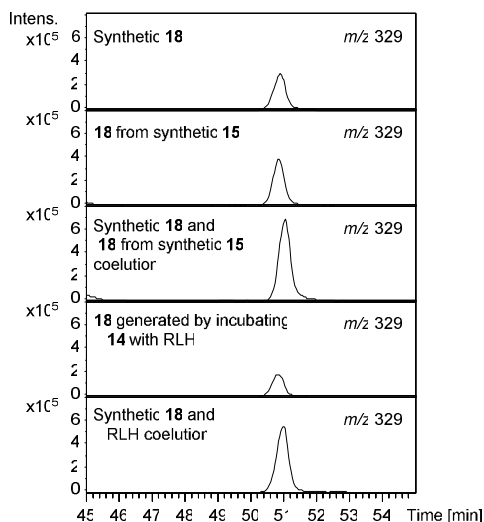

B.

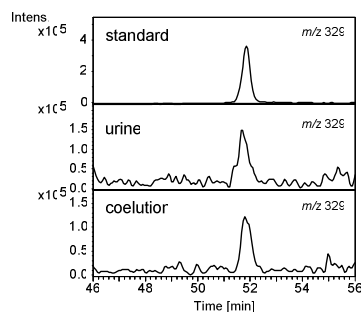

C.

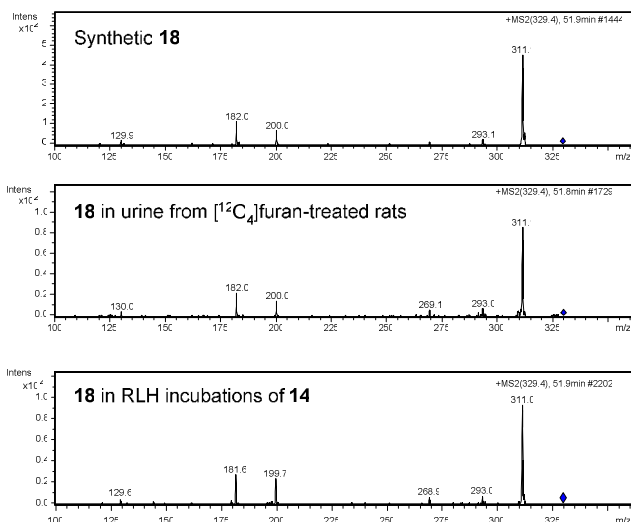

### Supplemental Figure 10.

**A.** Extracted ion current at 329 Da showing co-elution of *N*-acetyl-*S*-[1-(4-carboxybutyl)-1*H*-pyrrol-3-yl]-*L*-cysteine (**18**) with urinary metabolite **18**. LC-MS/MS analysis was performed on a Zorbax column eluted according to HPLC Method 3.

**B.** Extracted ion current at 329 Da showing co-elution of synthetic **18** with **18** generated from synthetic **15** or **15** formed in the incubation of **14** with RLH. LC-MS/MS analysis was performed on a Zorbax column eluted according to HPLC Method 3  
RLH = rat liver homogenate.

**C.** The mass spectra of synthetic **18** and **18** present in urine from furan-treated rats or supernatant from RLH incubations of **14**.
